# Supplementary material for: New Mitogenome Features of Philopotamidae (Insecta: Trichoptera) with Two New Species of Gunungiella
Source: MDPI journal article supplement (doi:10.3390/insects13121101), 2022-11-29
Supplement: s1 [file s1]

**Table S1.** Detailed taxonomic resources used in present study.

| Subfamily      | Subfamily      | Genus               | Species                                             | GenBank accession number                  |
|----------------|----------------|---------------------|-----------------------------------------------------|-------------------------------------------|
| Outgroup       |                |                     |                                                     |                                           |
| Philopotamidae | Chimarrinae    | <i>Chimarra</i>     | <i>Chimarra paramonorum</i> Hu, Sun & Wang, 2018*   | OL678008                                  |
|                |                |                     | <i>Chimarra sadayu</i> Malicky, 1993                | OP351513                                  |
|                | Philopotaminae | <i>Dolophilodes</i> | <i>Dolophilodes bellatula</i> Sun & Malicky, 2002*  | OL678011                                  |
|                |                |                     | <i>Gunungiella</i>                                  | <i>Gunungiella acanthoclada</i> Sun, 2007 |
|                |                |                     | <i>Gunungiella flabellata</i> sp. nov               | OP351515                                  |
|                |                |                     | <i>Gunungiella wangi</i> sp. nov                    | OP351516                                  |
|                |                | <i>Kisaura</i>      | <i>Kisaura zhejiangensis</i> Hu, 2019*              | OL678025                                  |
|                |                |                     | <i>Kisaura adamickai</i> Sun & Malicky, 2002        | OP351518                                  |
|                |                | <i>Wormaldia</i>    | <i>Wormaldia unispina</i> Sun, 1998*                | OL678056                                  |
|                |                |                     | <i>Wormaldia spinosa</i> Ross, 1956                 | OP351517                                  |
| Ingroup        |                |                     |                                                     |                                           |
| Hydropsychidae | Arctopsychinae | <i>Arctopsyche</i>  | <i>Arctopsyche spinescens</i> Gui & Yang, 2001*     | ON859124                                  |
|                |                |                     | <i>Arctopsyche</i> sp.*                             | ON859111                                  |
|                |                |                     | <i>Parapsyche elsis</i> Milne, 1936*                | ON859123                                  |
|                | Diplectroninae | <i>Diplectrona</i>  | <i>Diplectrona albofasciata</i> (Ulmer, 1913)       | ON859114                                  |
|                |                |                     | <i>Diplectrona hexapetala</i> Sun, 2012*            | OL678009                                  |
|                | Hydropsychinae | <i>Hydromanicus</i> | <i>Hydromanicus huapingensis</i> (Li & Tian, 1990)* | ON859115                                  |
|                |                |                     | <i>Hydromanicus melli</i> (Ulmer, 1926)*            | OL678021                                  |
|                |                | <i>Hydropsyche</i>  | <i>Hydropsyche cerva</i> (Li & Tian, 1990)*         | ON859117                                  |
|                |                |                     | <i>Hydropsyche formosana</i> Ulmer, 1911*           | ON859118                                  |
|                |                |                     | <i>Hydropsyche fryeri</i> Ulmer, 1915*              | NC_060325                                 |
|                |                |                     | <i>Hydropsyche fukienensis</i> Schmid, 1965*        | OL678022                                  |
|                |                |                     | <i>Hydropsyche rhomboana</i> Martynov, 1909*        | ON859120                                  |

|                |                |                    |                                                 |           |
|----------------|----------------|--------------------|-------------------------------------------------|-----------|
| Stenopsychidae | Stenopsychinae | <i>Stenopsyche</i> | <i>Hydropsyche trifora</i> (Li & Tian, 1990)*   | ON859122  |
|                |                |                    | <i>Stenopsyche angustata</i> Martynov, 1930*    | NC_051529 |
|                |                |                    | <i>Stenopsyche navasi</i> Ulmer, 1926*          | OL678052  |
|                |                |                    | <i>Stenopsyche tienmushanensis</i> Hwang, 1957* | MW201980  |

\* Published mitogenomes of Trichoptera.

**Table S2.** Nucleotide composition of mitogenomes of six philopotamid species.

|            | Species                         | Whole genome | PCGs  | FCP   | SCP   | TCP   | tRNAs | l-rRNA | s-rRNA | CR    |
|------------|---------------------------------|--------------|-------|-------|-------|-------|-------|--------|--------|-------|
| Length(bp) | <i>Chimarra sadayu</i>          | 16602        | 11096 | 3701  | 3699  | 3696  | 1448  | 1255   | 802    | 1994  |
|            | <i>Gunungiella flabellata</i>   | 15338        | 11106 | 3704  | 3700  | 3702  | 1479  | 1258   | 763    | 641   |
|            | <i>Gunungiella acanthoclada</i> | 15657        | 11108 | 3705  | 3703  | 3700  | 1405  | 1258   | 764    | 980   |
|            | <i>Gunungiella wangi</i>        | 15333        | 11104 | 3703  | 3701  | 3700  | 1489  | 1258   | 757    | 652   |
|            | <i>Kisaura adamickai</i>        | 15949        | 11112 | 3706  | 3704  | 3702  | 1458  | 1360   | 765    | 1221  |
|            | <i>Wormaldia spinosa</i>        | 15181        | 11132 | 3712  | 3711  | 3709  | 1456  | 1321   | 748    | 543   |
| A+T (%)    | <i>Chimarra sadayu</i>          | 77.75        | 75.5  | 74.05 | 72.32 | 84.75 | 83.08 | 81.51  | 84.04  | 81.34 |
|            | <i>Gunungiella flabellata</i>   | 73.63        | 69.63 | 71.13 | 71.62 | 76.95 | 82.69 | 80.68  | 85.71  | 93.45 |
|            | <i>Gunungiella acanthoclada</i> | 76.11        | 72.17 | 70.77 | 71.50 | 68.72 | 82.78 | 82.51  | 86.52  | 93.37 |
|            | <i>Gunungiella wangi</i>        | 75.51        | 72.01 | 72.50 | 71.70 | 75.26 | 83.68 | 81.72  | 86.39  | 91.26 |
|            | <i>Kisaura adamickai</i>        | 81.95        | 79.92 | 77.54 | 74.16 | 90.88 | 83.81 | 85.51  | 87.84  | 90.01 |
|            | <i>Wormaldia spinosa</i>        | 77.96        | 75.41 | 73.41 | 72.55 | 84.39 | 83.17 | 83.57  | 85.43  | 93.19 |
| AT-Skew    | <i>chimarra sadayu</i>          | 0.01         | -0.13 | 0.05  | -0.39 | -0.06 | 0.02  | -0.02  | 0.05   | -0.04 |
|            | <i>Gunungiella flabellata</i>   | 0.06         | -0.14 | 0.03  | -0.40 | 0.02  | 0.00  | 0.00   | 0.05   | 0.06  |
|            | <i>Gunungiella acanthoclada</i> | 0.04         | -0.14 | 0.03  | -0.39 | 0.01  | 0.01  | 0.00   | 0.04   | 0.01  |
|            | <i>Gunungiella wangi</i>        | 0.03         | -0.15 | 0.01  | -0.40 | -0.02 | -0.01 | 0.01   | 0.05   | 0.03  |

|         |                                 |       |       |       |       |       |      |      |      |       |
|---------|---------------------------------|-------|-------|-------|-------|-------|------|------|------|-------|
| GC-Skew | <i>Kisaura adamickai</i>        | -0.02 | -0.12 | 0.02  | -0.37 | -0.03 | 0.00 | 0.01 | 0.04 | -0.03 |
|         | <i>Wormaldia spinosa</i>        | 0.00  | -0.13 | 0.03  | -0.38 | -0.04 | 0.02 | 0.01 | 0.05 | -0.05 |
|         | <i>chimarra sadayu</i>          | -0.26 | 0.00  | -0.07 | -0.04 | 0.24  | 0.13 | 0.38 | 0.39 | 0.24  |
|         | <i>Gunungiella flabellata</i>   | -0.46 | -0.09 | 0.00  | 0.17  | 0.40  | 0.05 | 0.50 | 0.43 | -0.24 |
|         | <i>Gunungiella acanthoclada</i> | -0.43 | -0.09 | 0.02  | 0.17  | 0.45  | 0.07 | 0.48 | 0.38 | 0.02  |
|         | <i>Gunungiella wangi</i>        | -0.42 | -0.08 | -0.03 | 0.16  | 0.41  | 0.14 | 0.49 | 0.39 | -0.21 |
|         | <i>Kisaura adamickai</i>        | -0.25 | -0.01 | -0.09 | 0.09  | 0.35  | 0.14 | 0.31 | 0.31 | -0.11 |
|         | <i>Wormaldia spinosa</i>        | -0.36 | -0.07 | 0.02  | 0.12  | 0.39  | 0.09 | 0.41 | 0.32 | -0.22 |

Abbreviations: FCP: First codon position; SCP: Second codon position TCP: Third codon position.

**Table S3.** PCR primers used to sequence *mtCOI* genes of Trichoptera in this study.

| Primer  | Sequence                   |
|---------|----------------------------|
| LCO1490 | GGTCAACAAATCATAAAGATATTGG  |
| HCO2198 | TAAACTTCAGGGTGACCAAAAAATCA |

**Table S4.** The best model for each partition of the three Matrixs.

| Matrixs | Partition names               | Best model   |
|---------|-------------------------------|--------------|
| PCG12   | <i>ATP6, COX2, COX3, CYTB</i> | GTR+F+I+G4   |
|         | <i>ATP8, ND2, ND3, ND6</i>    | GTR+F+I+G4   |
|         | <i>COXI</i>                   | TIM2+F+I+G4: |
|         | <i>ND1, ND4, ND4L, ND5,</i>   | GTR+F+I+G4   |
| PCG12R  | 16S, 12S                      | GTR+F+I+G4   |
|         | <i>ATP6, COX2, COX3, CYTB</i> | GTR+F+I+G4   |

|        |                                                    |               |
|--------|----------------------------------------------------|---------------|
|        | <i>ATP8, ND2, ND3, ND6</i>                         | GTR+F+I+G4    |
|        | <i>COX1</i>                                        | TIM2+F+I+G4:  |
|        | <i>ND1, ND4, ND4L, ND5,</i>                        | GTR+F+I+G4    |
|        | <i>ATP6, ATP8, COX2, COX3, CYTB, ND2, ND3, ND6</i> | mtZOA+F+I+G4: |
| PCGFAA | <i>COX1</i>                                        | mtART+I+G4:   |
|        | <i>ND1, ND4, ND4L, ND5</i>                         | mtMet+F+R4:   |

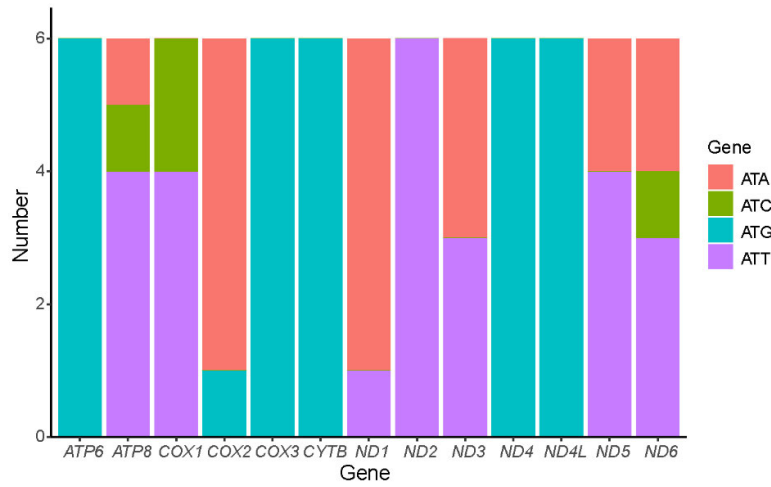

**Figure S1.** Start codons of PCGs among Trichoptera mitogenomes.

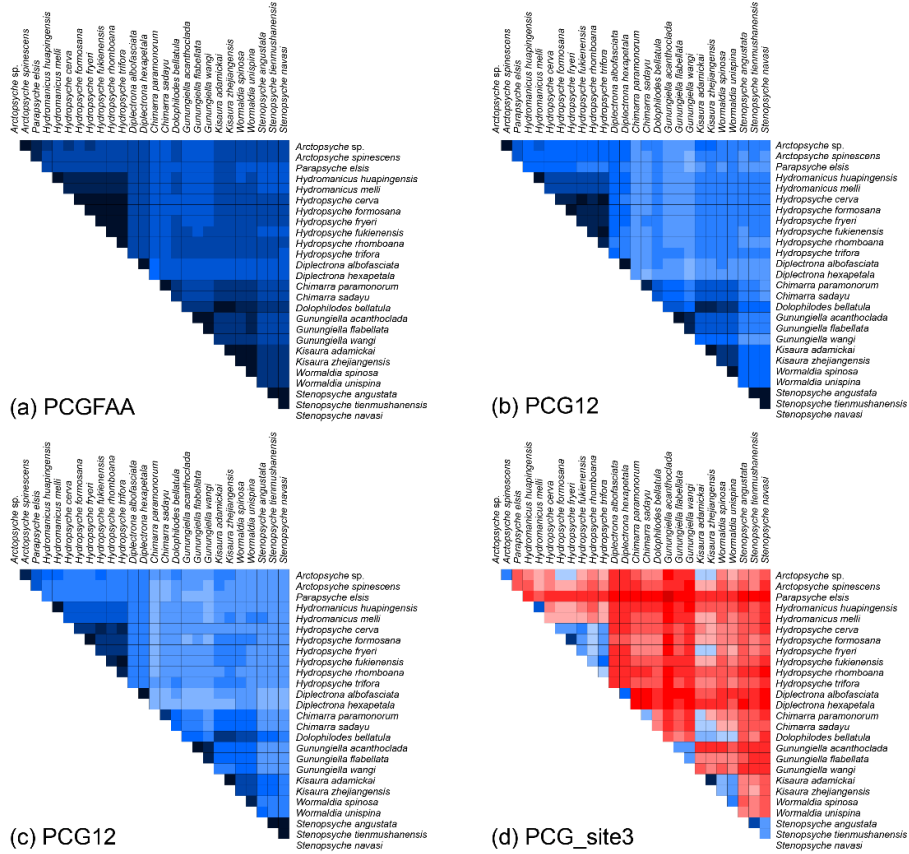

**Figure S2.** Heterogeneity of sequence composition for different datasets. The pairwise Aliscore values are represented by colored. The scores range from  $-1$  showing full random similarity (dark blue), to  $+1$  showing non-random similarity (shiny red). (a) PCGFAA (b) PCG12R; (c) PCG12; (d) PCGs\_site3.
